# Supplementary material for: Heteropolyacids aided rapid and convenient syntheses of highly ordered MCM-41 and MCM-48: exploring the accelerated process by 29Si MAS NMR and powder X-ray diffraction studiesElectronic supplementary information (ESI) available: powder XRD patterns and instrumentation details. See http://www.rsc.org/suppdata/cc/b2/b206482k/
Source: Royal Society of Chemistry journal article supplement (doi:10.1039/b206482k), 2002-09-20
Supplement: b206482k.doc [file b206482k.doc]

**Heteropolyacids Aided Rapid and Convenient Syntheses of Highly Ordered MCM-41 and MCM-48: Exploring the Accelerated Process by 29Si MAS NMR and Powder X-Ray Diffraction Studies**

Kausik Mukhopadhyay,a,* Anirban Ghoshb and Rajiv Kumarb,*

aHomogeneous Catalysis Division and bCatalysis Division, National Chemical Laboratory, Dr. Homi Bhabha Road, Pune 411008, India

**Figure S1.** Powder XRD patterns of calcined MCM-41 samples synthesized at 100°C for 4 h using PW12O403- as promoter and following Si/promoter ratios, (a) 25, (b) 50, (c) 600, (d) 400, (e) 300, (f) 200, and (g) 100.

**Figure S2.** Powder XRD patterns of calcined MCM-41 samples synthesized at 100°C for 4 h by simultaneous addition of PO43- and WO42- keeping Si: PO43- = 300 and following WO42-: PO43- ratios, (a) 1, (b) 3, (c) 6, (d) 12, and (e) 15.

**Instrumentation details**:

XRD patterns were recorded at room temperature on a Rigaku D Max III VC instrument with Ni filtered Cu K radiation ( = 1.5404 Å), in the 2 range of 1.5 to 10° at a scan rate of 1°/min. TEM images were taken on a Jeol Model 1200 EX instrument operated at an accelerating voltage of 100 kV. SEM images were taken on a Philips Model XL 30 instrument. The NMR experiments were performed on a Bruker MSL 300 spectrometer, in a 7 mm zirconia rotor at 4.0 kHz and 11.7 Tesla. Chemical shifts were measured with respect to tetraethyl orthosilicate (TEOS) as the reference compound. The *Q*2: *Q*3: *Q*4 ratios were calculated using Jandel Scientific PeakFit deconvolution program. The specific surface areas of the samples were determined by the BET method using N2 adsorption measured with an Omnisorb CX-100 Coulter instrument. Prior to the adsorption, the samples were activated at 150°C for 6 h at 10-4 Torr.
